# Supplementary material for: Anatomical pattern of entheseal and synovial fibroblast activation in patients with psoriasis and its risk of developing psoriatic arthritis
Source: PubMed Central journal article supplement — RMD Open. 2024 Jun 11;10(2):e004294. doi: 10.1136/rmdopen-2024-004294 (PMC11168197; doi:10.1136/rmdopen-2024-004294), 2024-06-11

## Supplementary information to the manuscript:

### Anatomical pattern of enthesal and synovial fibroblast activation in psoriasis patients and its risk for developing psoriatic arthritis

Giulia Corte, M.D.<sup>1,2</sup>, Armin Atzinger, M.D.<sup>3</sup>, Selahattin-Alp Temiz, MSc, M.D.<sup>1,2</sup>, Rita Noversa de Sousa, M.D.<sup>1,2,4</sup>, Verena Schönau M.D.<sup>1,2</sup>, Gabriella Raimondo, M.D.<sup>1,2</sup>, Arnd Kleyer, M.D.<sup>1,2,5</sup>, Torsten Kuwert, M.D.<sup>3</sup>, Andreas Ramming, M.D.<sup>1,2</sup>, David Simon, M.D.<sup>1,2,5</sup>, Michael Sticherling, M.D.<sup>2,6</sup>, Christian Schmidkonz, M.D.<sup>3,7</sup>, Georg Schett, M.D.<sup>1,2</sup>, Filippo Fagni, M.D.<sup>1,2</sup>

<sup>1</sup> Department of Internal Medicine 3, Friedrich-Alexander University (FAU) Erlangen-Nuremberg and Universitätsklinikum Erlangen, Erlangen, Germany.

<sup>2</sup> Deutsches Zentrum fuer Immuntherapie (DZI), FAU Erlangen-Nuremberg and Universitätsklinikum Erlangen, Germany.

<sup>3</sup> Department of Nuclear Medicine, Friedrich-Alexander University (FAU) Erlangen-Nuremberg and Universitätsklinikum Erlangen, Erlangen, Germany.

<sup>4</sup> Serviço de Medicina Interna, Hospital Pedro Hispano, Unidade Local de Saúde de Matosinhos, Matosinhos, Portugal

<sup>5</sup> Department of Rheumatology and Clinical Immunology, Charité-Universitätsmedizin, Berlin, Germany

<sup>6</sup> Department of Dermatology, Friedrich-Alexander University (FAU) Erlangen-Nuremberg and Universitätsklinikum Erlangen, Erlangen, Germany.

<sup>7</sup> Institute for Medical Engineering, Technical University of Applied Sciences Amberg-Weiden, Weiden, Germany.

#### Correspondence to:

Filippo Fagni, MD, Department of Internal Medicine 3 - Rheumatology and Immunology, Friedrich-Alexander University (FAU) Erlangen-Nürnberg and Universitätsklinikum Erlangen, 91054, Erlangen, Germany. E-mail: [filippo.fagni@uk-erlangen.de](mailto:filippo.fagni@uk-erlangen.de)

## Supplementary Materials

### Supplementary methods

The assessment of FAPI uptake in PET/CT scans was performed bilaterally (when applicable) at the following synovial and enthesal regions of interest:

- Synovial joints: Temporomandibular joint, Acromioclavicular joint, Sternoclavicular joint, Shoulder, Elbow, Wrist, MCPs, Hand PIPs, Hand DIPs, Hip, Knee, Ankle, Tarsus, MTPs, Foot PIPs, Foot DIPs.
- Entheses: 1st Costochondral, 7th Costochondral, Long biceps tendon enthesis, Lateral humeral epicondyle, Medial humeral epicondyle, Postero-superior iliac spine, 5th lumbar spinous process, Antero-superior iliac spine, Iliac crest, Great Trochanter, Medial femur condyle, Quadriceps tendon enthesis, Distal patellar tendon enthesis, Achilles Tendon enthesis, Plantar fascia enthesis
- Axial skeleton: cervical spine, thoracical spine, lumbar spine, sacroiliac joint

## Supplementary tables and figures

**Supplementary table 1** – Clinical findings at joints and enthesal sites

|                                 | Site                    | Tenderness, n (%)           |        |
|---------------------------------|-------------------------|-----------------------------|--------|
| <b>Joints</b>                   | Temporomandibular joint | 0 (0%)                      |        |
|                                 | Acromioclavicular joint | 0 (0%)                      |        |
|                                 | Sternoclavicular joint  | 0 (0%)                      |        |
|                                 | Shoulder                | 15 (42%)                    |        |
|                                 | Elbow                   | 6 (17%)                     |        |
|                                 | Wrist                   | 14 (39%)                    |        |
|                                 | MCPs                    | 15 (42%)                    |        |
|                                 | Hand PIPs               | 9 (25%)                     |        |
|                                 | Hand DIPs               | 6 (17%)                     |        |
|                                 | Hip                     | 2 (6%)                      |        |
|                                 | Knee                    | 8 (22%)                     |        |
|                                 | Ankle                   | 10 (28%)                    |        |
|                                 | Tarsus                  | 2 (6%)                      |        |
|                                 | MTPs                    | 1 (3%)                      |        |
|                                 | Foot PIPs               | 8 (22%)                     |        |
|                                 | Foot DIPs               | 0 (0%)                      |        |
|                                 | <b>Entheses</b>         | 1st Costochondral           | 1 (3%) |
|                                 |                         | 7th Costochondral           | 0 (0%) |
|                                 |                         | Long biceps tendon enthesis | 3 (8%) |
| Lateral humeral epicondyle      |                         | 18 (50%)                    |        |
| Medial humeral epicondyle       |                         | 5 (14%)                     |        |
| Postero-superior iliac spine    |                         | 3 (8%)                      |        |
| 5th lumbar spinous process      |                         | 14 (39%)                    |        |
| Antero-superior iliac spine     |                         | 0 (0%)                      |        |
| Iliac crest                     |                         | 0 (0%)                      |        |
| Great Trochanter                |                         | 0 (0%)                      |        |
| Medial femur condyle            |                         | 1 (3%)                      |        |
| Quadriceps tendon enthesis      |                         | 0 (0%)                      |        |
| Distal patellar tendon enthesis |                         | 1 (3%)                      |        |
| Achilles Tendon enthesis        |                         | 12 (33%)                    |        |
| Plantar fascia enthesis         |                         | 0 (0%)                      |        |

**Supplementary table 2** – Ultrasound findings at joints and enthesal sites

|                          |                                 | Site                 | Finding present, n (%) |
|--------------------------|---------------------------------|----------------------|------------------------|
| <b>Joints</b>            | Wrist                           | Synovial hypertrophy | 14 (31%)               |
|                          |                                 | Power-Doppler        | 4 (9%)                 |
|                          | MCP1                            | Synovial hypertrophy | 0 (0%)                 |
|                          |                                 | Power-Doppler        | 0 (0%)                 |
|                          | MCP2                            | Synovial hypertrophy | 0 (0%)                 |
|                          |                                 | Power-Doppler        | 0 (0%)                 |
|                          | MCP3                            | Synovial hypertrophy | 1 (2%)                 |
|                          |                                 | Power-Doppler        | 0 (0%)                 |
|                          | MCP4                            | Synovial hypertrophy | 0 (0%)                 |
|                          |                                 | Power-Doppler        | 0 (0%)                 |
| MCP5                     | Synovial hypertrophy            | 1 (2%)               |                        |
|                          | Power-Doppler                   | 0 (0%)               |                        |
| Knee                     | Synovial hypertrophy            | 5 (12%)              |                        |
|                          | Power-Doppler                   | 1 (2%)               |                        |
| <b>Entheses</b>          | Lateral Humeral Epicondyle      | Power-Doppler        | 2 (4%)                 |
|                          |                                 | Hypoechoogenicity    | 11 (24%)               |
|                          |                                 | Thickening           | 6 (13%)                |
|                          |                                 | Calcifications       | 10 (22%)               |
|                          |                                 | Erosions             | 1 (2%)                 |
|                          | Quadriceps tendon enthesis      | Power-Doppler        | 0 (0%)                 |
|                          |                                 | Hypoechoogenicity    | 7 (17%)                |
|                          |                                 | Thickening           | 2 (5%)                 |
|                          |                                 | Calcifications       | 3 (7%)                 |
|                          |                                 | Erosions             | 0 (0%)                 |
|                          | Distal patellar tendon enthesis | Power-Doppler        | 0 (0%)                 |
|                          |                                 | Hypoechoogenicity    | 2 (5%)                 |
|                          |                                 | Thickening           | 2 (5%)                 |
|                          |                                 | Calcifications       | 1 (2%)                 |
|                          |                                 | Erosions             | 1 (2%)                 |
| Achilles tendon enthesis | Power-Doppler                   | 4 (9%)               |                        |
|                          | Hypoechoogenicity               | 7 (15%)              |                        |
|                          | Thickening                      | 2 (4%)               |                        |
|                          | Calcifications                  | 9 (20%)              |                        |
|                          | Erosions                        | 2 (4%)               |                        |

**Supplementary table 3** – Agreement of clinical findings at PsA diagnosis with <sup>68</sup>Ga-FAPI-04 uptake

|                                                  |                   | <b><sup>68</sup>Ga-FAPI-04 uptake</b> |             |               |
|--------------------------------------------------|-------------------|---------------------------------------|-------------|---------------|
|                                                  |                   | Absent                                | Present     | Total         |
| <b>Physical Examination<br/>at PsA diagnosis</b> | Normal            | 618<br>85.2 %                         | 56<br>7.7 % | 674<br>92.9 % |
|                                                  | Clinically active | 36<br>5 %                             | 15<br>2.1 % | 51<br>7.1 %   |
|                                                  | Total             | 654<br>90.2 %                         | 71<br>9.8 % | 725<br>100 %  |

**Supplementary table 4** – Correspondence between the clinical manifestations leading to the diagnosis of PsA and FAPI signal at PET/CT.

|         | <b>Clinical manifestation leading to PsA diagnosis<br/>(i.e. target joint)</b> | <b>Confirmatory imaging</b> | <b>FAPI signal<br/>at target joint</b> | <b>SUV Max<br/>at target joint</b> | <b>FAPI signal in<br/>other joints</b> | <b>PET/CT joint count</b> |
|---------|--------------------------------------------------------------------------------|-----------------------------|----------------------------------------|------------------------------------|----------------------------------------|---------------------------|
| Pat. 1  | Achilles tendon enthesitis & foot dactylitis                                   | Ultrasound                  | +                                      | 5.5                                | +                                      | 9                         |
| Pat. 2  | Wrist joint arthritis                                                          | MRI                         | +                                      | 2.7                                | +                                      | 9                         |
| Pat. 3  | Wrist joint arthritis                                                          | MRI                         | -                                      | .                                  | +                                      | 2                         |
| Pat. 4  | Bilateral shoulder arthritis                                                   | MRI                         | +                                      | 12.2                               | +                                      | 11                        |
| Pat. 5  | Knee joint arthritis                                                           | MRI                         | +                                      | 9,4                                | +                                      | 12                        |
| Pat. 6  | Spondylitis of the lumbar spine                                                | MRI                         | -                                      | .                                  | +                                      | 20                        |
| Pat. 7  | Achilles tendon enthesitis                                                     | Ultrasound                  | +                                      | 2.9                                | +                                      | 10                        |
| Pat. 8  | Wrist joint arthritis                                                          | MRI                         | -                                      | .                                  | +                                      | 6                         |
| Pat. 9  | Wrist joint arthritis                                                          | Ultrasound                  | -                                      | .                                  | +                                      | 32                        |
| Pat. 10 | Patellar tendon enthesitis                                                     | Ultrasound                  | +                                      | 11.9                               | +                                      | 45                        |
| Pat. 11 | Lateral humeral epicondyle enthesitis                                          | Ultrasound                  | -                                      | .                                  | +                                      | 10                        |

PsA: Psoriatic Arthritis; FAPI: fibroblast activation protein inhibitor; SUV Max: maximum standard uptake value; PET/CT: positron emission tomography/computed tomography; MRI: magnetic resonance imaging.

**Supplementary Figure 1** – Spearman's rank correlation plot of BMI and PET/CT joint count. The Correlation line is represented in blue.

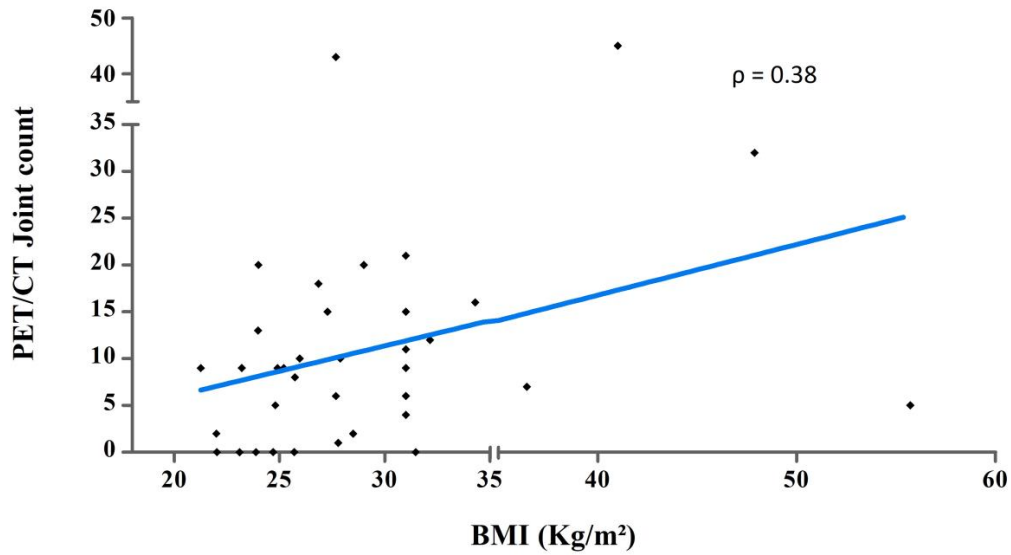

PET/CT: Positron emission tomography/Computed tomography; BMI: body mass index

**Supplementary Figure 2** – Logistic regression model of ultrasound findings in joints and entheses with FAPI uptake. The regression curve is represented in blue. The shaded area represent the 95% confidence interval.

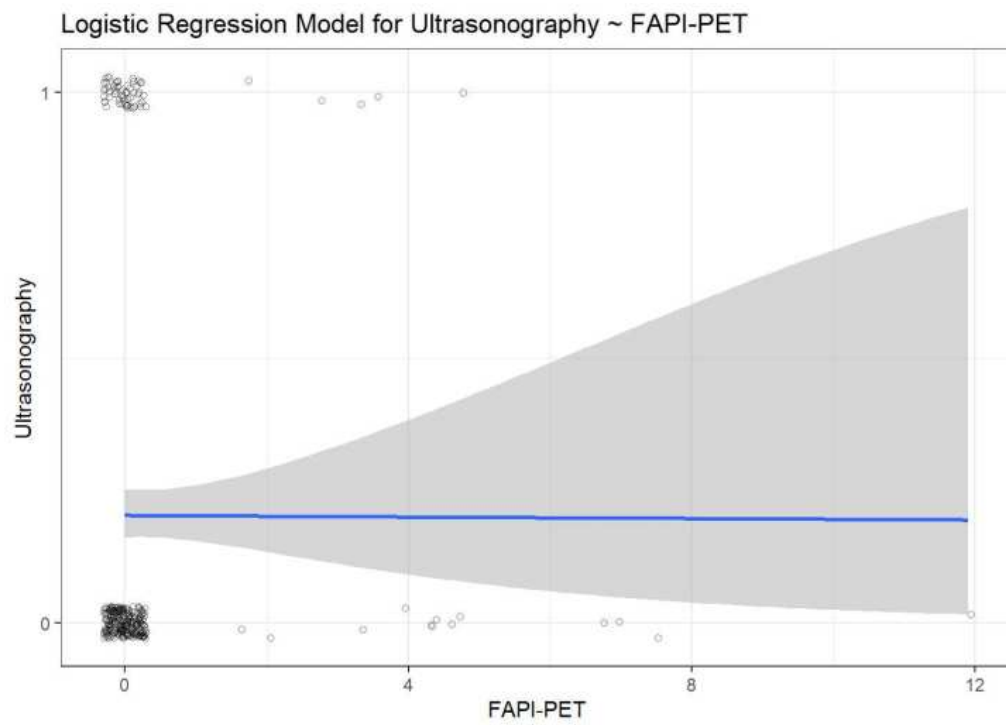



**Supplementary Figure 3.** Stepwise model of the development of PsA

Left: Synovioenthesal stress by mechanical and other factors leading to resident fibroblast activation at synovial and enthesal sites that can be visualized by PET/CT scanning using fibroblast activation protein inhibitor (FAP) tracer; middle: influx of immune cells into primed joints and entheses triggering subclinical inflammation with changes in ultrasound or magnetic resonance imaging scans; Right: Further immune cell influx and development of joint swelling resembling psoriatic arthritis (PsA).

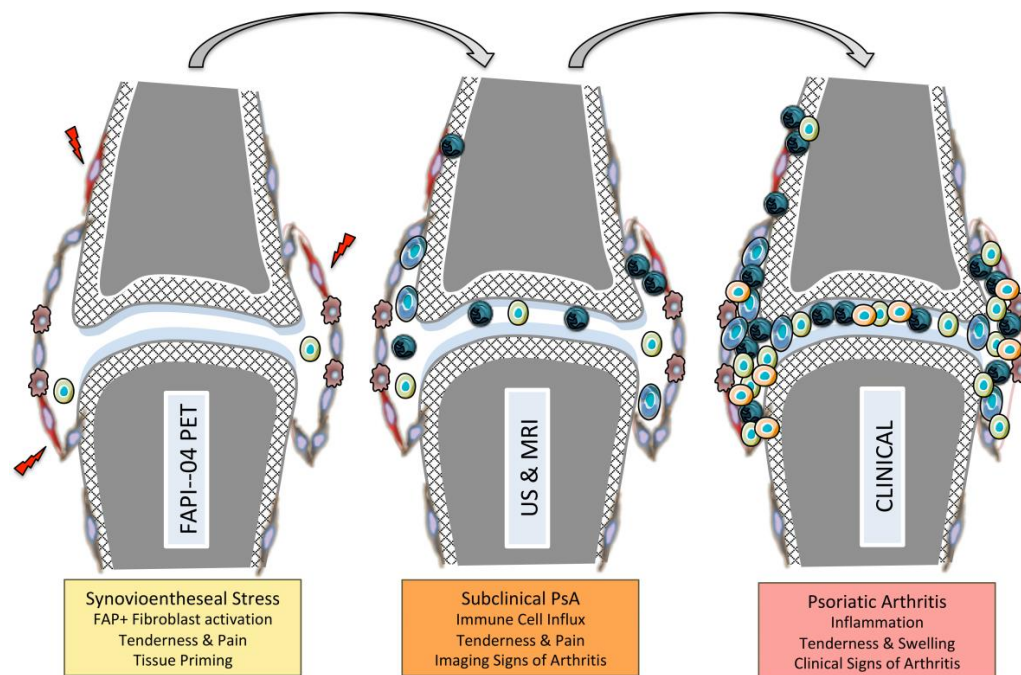

**Supplementary Figure 4.**  $^{68}\text{Ga}$ -FAPI-04-PET/CT findings in a patient with highly active Psoriatic Arthritis compared with conventional imaging. **Panel A:** PET scan revealing avid  $^{68}\text{Ga}$ -FAPI-04 uptake in the right hip (arrow) and knee (asterisk), in the digits of the right foot (arrowhead), and in the nails of both hands and of the right foot. **Panel B:** corresponding ultrasound (left) and MRI (right) scans of the right hip joint, revealing severe synovitis (arrow) with enthesophyte formation. **Panel C:** bursitis with synovial hypertrophy (asterisk) of the medial knee recess at ultrasound. **Panel D:** Photograph of the patient's foot showing nail psoriasis.

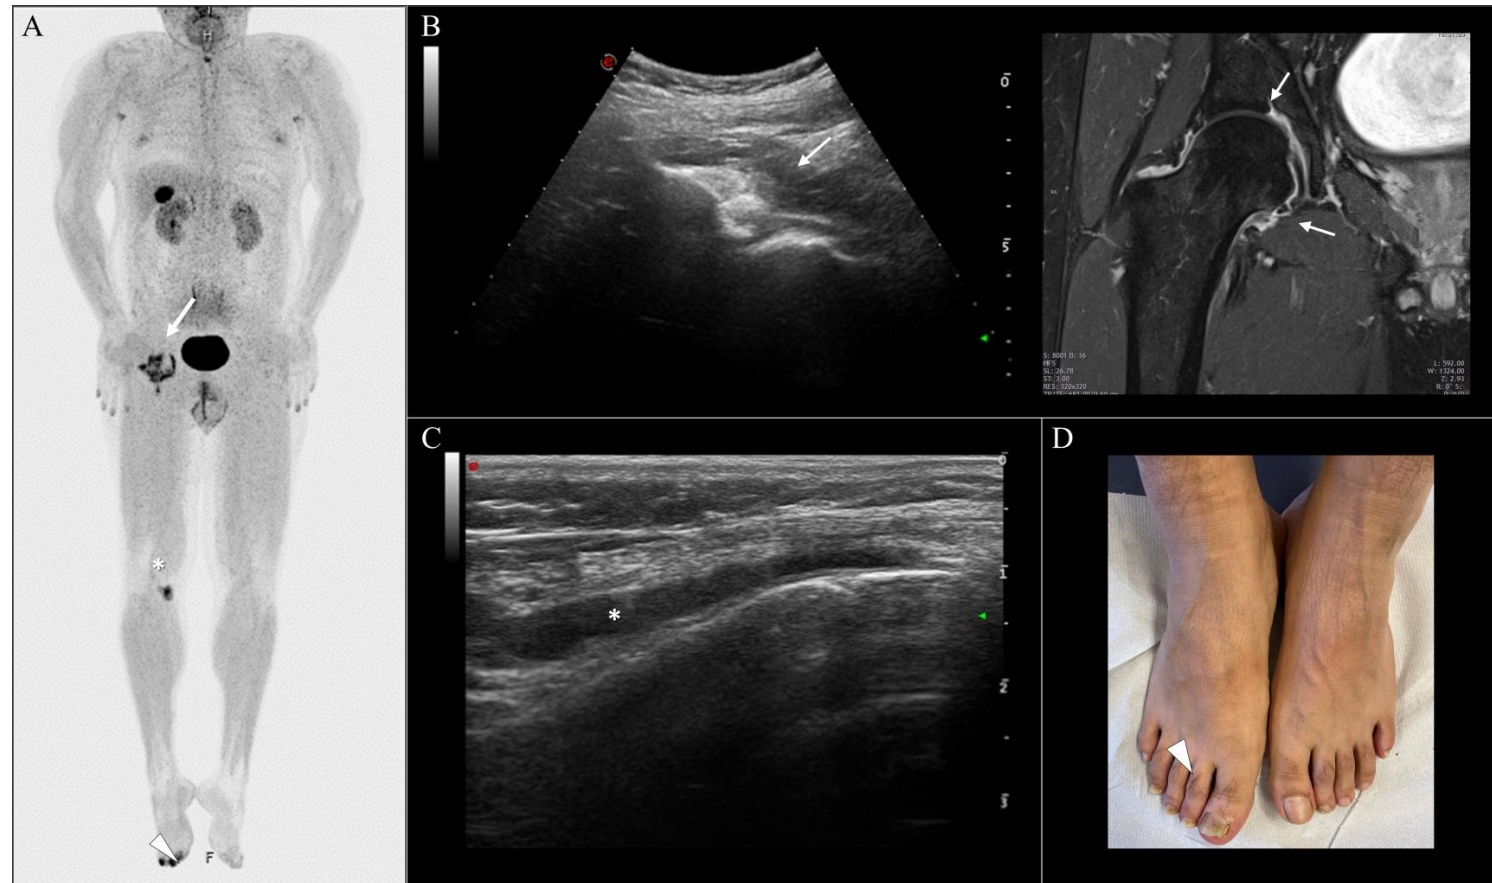

Supplement: rmdopen-2024-004294supp001.pdf [file rmdopen-2024-004294supp001.pdf]
