# Supplementary figures and images for: Anatomical pattern of entheseal and synovial fibroblast activation in patients with psoriasis and its risk of developing psoriatic arthritis
Source: PubMed Central journal article supplement — RMD Open. 2024 Jun 11;10(2):e004294. doi: 10.1136/rmdopen-2024-004294 (PMC11168197; doi:10.1136/rmdopen-2024-004294), 2024-06-11

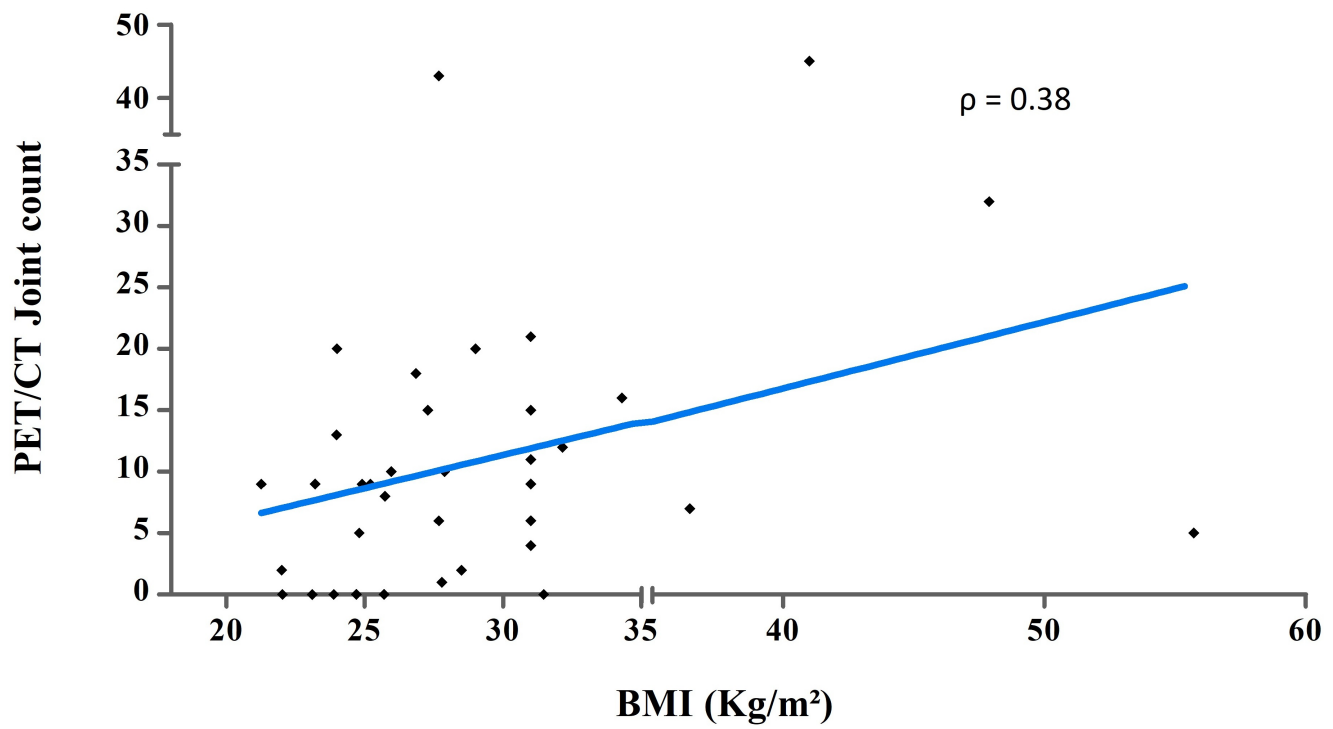

Supplement: rmdopen-2024-004294supp002.pdf [file rmdopen-2024-004294supp002.pdf]

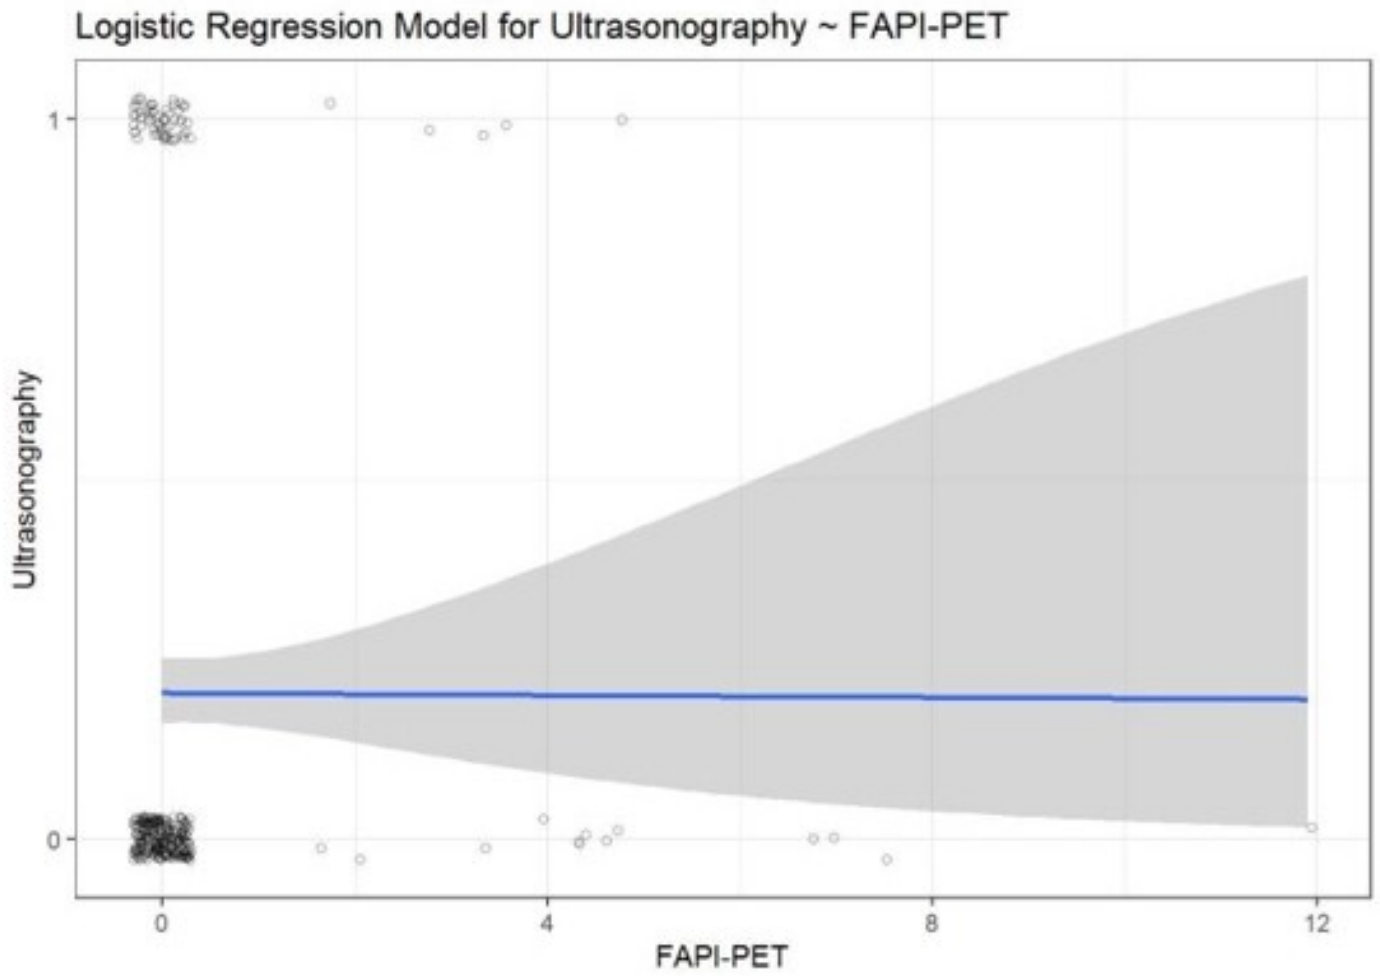

Supplement: rmdopen-2024-004294supp003.pdf [file rmdopen-2024-004294supp003.pdf]

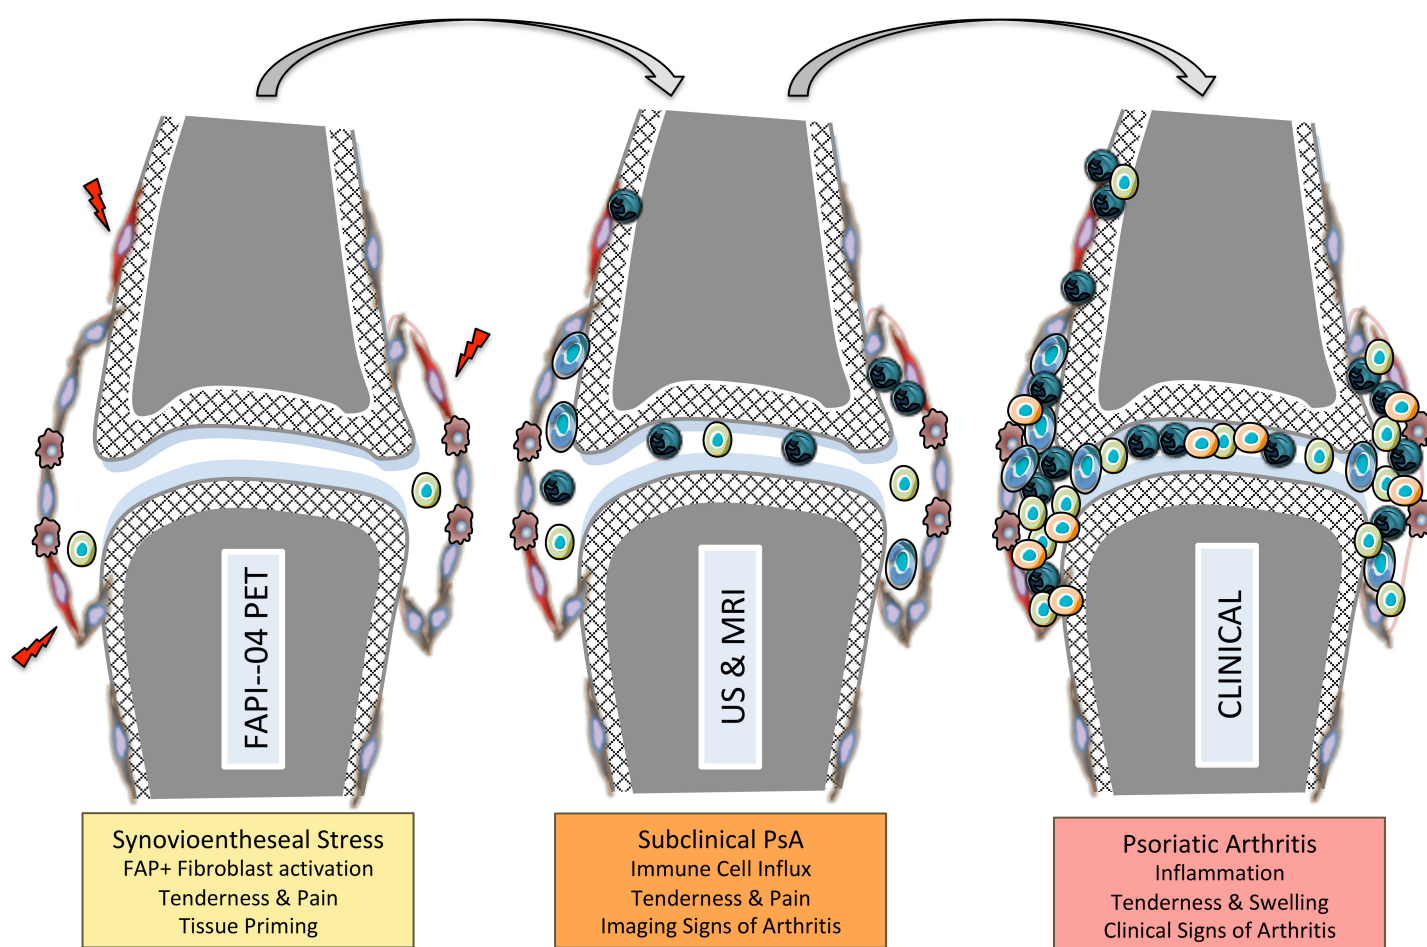

Supplement: rmdopen-2024-004294supp004.pdf [file rmdopen-2024-004294supp004.pdf]

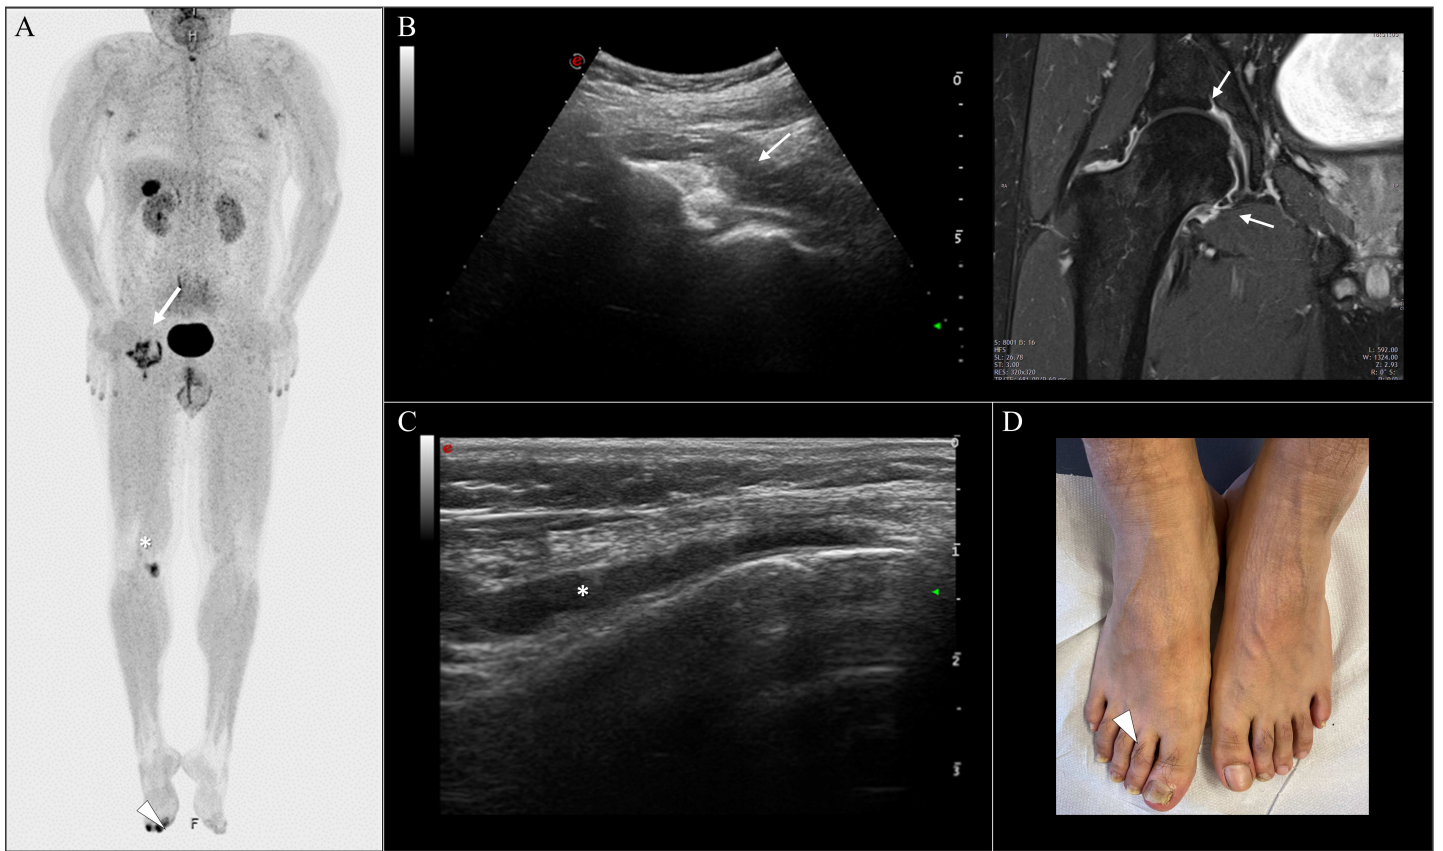

Supplement: rmdopen-2024-004294supp005.pdf [file rmdopen-2024-004294supp005.pdf]
